# Supplementary material
Source: publisher site journal article supplement (https://www.dovepress.com/get_supplementary_file.php?f=398455.docx)
Supplement: Supplementary file 1 [file get_supplementary_file.php]

**Supplementary 1.** FINDRISC and ModAsian FINDRISC and the risk of developing type 2 diabetes mellitus in the next 10 year

| Risk factor | FINDRISC | | ModAsian FINDRISC | | Score |
| --- | --- | --- | --- | --- | --- |
| Age (years) | < 45 | | < 45 | | 0 |
| 45 – 54 | | 45 – 54 | | 2 |
| 55 – 64 | | 55 – 64 | | 3 |
| > 64 | | > 64 | | 4 |
| Body mass index (kg/m2) | < 25 | | < 23 | | 0 |
| 25 to 30 | | 23 to < 25 | | 1 |
| > 30 | | ≥ 25 | | 3 |
| Waist circumference (cm) | Men | Women | Men | Women |  |
| < 94 | < 80 | <82 | < 72 | 0 |
| 94 – 102 | 80 – 88 | 82 – 90 | 72 - 80 | 3 |
| > 102 | > 88 | > 90 | > 80 | 4 |
| Daily physical activity > 30 minutes | Yes | | Yes | | 0 |
| No | | No | | 2 |
| Vegetable, fruit, or berries consumption | Every day | | Every day | | 0 |
| Not every day | | Not every day | | 1 |
| Taken antihypertensive medication regularly | No | | No | | 0 |
| Yes | | Yes | | 2 |
| History has been found of high blood glucose | No | | No | | 0 |
| Yes | | Yes | | 5 |
| Family history of diabetes mellitus (type 1 or type 2) | No | | No | | 0 |
| Yes: grandparent, aunt, uncle, or first cousin | | Yes: grandparent, aunt, uncle, or first cousin | | 3 |
| Yes: parent, brother, sister or own child | | Yes: parent, brother, sister or own child | | 5 |
| Risk of developing type 2 diabetes mellitus in the next 10 year | | | | | |
| Total score | Risk stratification | | Estimated risk | | |
| < 7 | Low | | 1/100 | | |
| 7 – 11 | Slightly elevated | | 1/25 | | |
| 12 – 14 | Moderate | | 1/6 | | |
| 15 – 20 | High | | 1/3 | | |
| > 20 | Very high | | 1/2 | | |
